# Supplementary material for: Proximity to Neighborhood Services and Property Values in Urban Area: An Evaluation through the Hedonic Pricing Model
Source: MDPI journal article supplement (doi:10.3390/land12040859), 2023-04-11
Supplement: s1 [file s1]

## QUESTIONNAIRE

### THE IMPACT OF GREEN SPACES ON SALE'S PROPERTY VALUES THROUGH THE HEDONIC MODEL

(A CASE STUDY OF SELECTED AREAS OF GUJRAT CITY)

|      |  |
|------|--|
| Date |  |
| Area |  |

#### Locational Attributes

- (1) What is the location of your house/property with respect to the green space?  
(a) Adjacent (b) Very near (c) Near (d) Distance
- (2) Do you have easy access to road?  
(a) Yes (b) No

#### Structural Attribute

- (3) What is the size of your house/property in 26 sq.ft?  
(a) 2-4 (b) 5-7 (c) 8-11 (d) 12/ >
- (4) How many storeys of the house/property?  
(a) Single storey (b) Double storey (c) Triple storey (d) More than triple storeys
- (5) How many rooms are in your house/property? -----
- (6) How many bath rooms are in your house/property? -----
- (7) How much area of the house/property is covered? -----
- (8) What is the current price of the land in this area? (Per 26 sq.ft)
- (9) Is this your own property? (a) Yes (b) No
- (10) What is the total price of your house/property (Land + Building)? -----

#### Neighborhood Attributes

- (11) What is the nature of land in surrounding?  
(a) Open space (b) Commercial area (c) Residential area (d) Agricultural area
- (12) What is the distance from your house to the hospital?  
(a) 1 KM or less (b) 1.5 KM or less (c) 2 KM or less (d) 2.5 KM or more
- (13) What is the distance from your house to the market/bazaar?  
(a) 1 KM or less (b) 1.5 KM or less (c) 2 KM or less (d) 2.5 KM or more

### **Community Attributes**

(14) Nature of community, with respect to social status, is same?

(a) Yes (b) No

(15) Nature of community, with respect to Job status, is same?

(a) Yes (b) No

### **Socio-Economic Profile**

(16) What is your level of education?

(a) Middle or less (b) Matric (c) Intermediate (d) Graduation/ above

(17) What is your job?

(a) Govt. employee (b) Private worker (c) Own business (d) Daily wage worker

(18) What is your monthly income?

(a) 15000 or less (b) 30000 or less (c) 45000 or less (d) More than 46000

(19) How many family members you are?

(a) 1-3 (b) 4-6 (c) 7-10 (d) 11 / >

(20) Did you have your own transport?

(a) Yes (b) No

(21) Did the people sale/purchase the property/house in this area?

(a) Yes (b) No

(22) Do you visit the park or green space?

(a) Yes (b) No

Feedback/Suggestions (Optional)

(Thank you very much)
