# Supplementary material for: Proximity to Neighborhood Services and Property Values in Urban Area: An Evaluation through the Hedonic Pricing Model
Source: MDPI journal article supplement (doi:10.3390/land12040859), 2023-04-11
Supplement: s1 [file s1]

Archive with 1 entries (1 files):
- land-2267151-supplementary.pdf
